# Supplementary material
Source: publisher figshare collection journal article supplement (https://sage.figshare.com/ndownloader/files/37570192)

Table S1


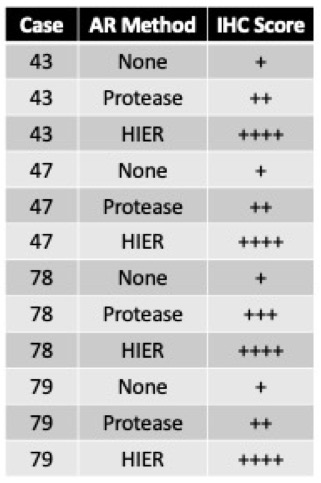

Supplement: Supplementary file 1 [file 37570192]
